# Supplementary material for: Luminescent metal clusters/barium sulfate composites for white light-emitting devices and anti-counterfeiting labels
Source: RSC Adv. 2018 Jan 15;8(6):2866–71. doi: 10.1039/c7ra11804j (PMC9077558; doi:10.1039/c7ra11804j)
Supplement: RA-008-C7RA11804J-s001 [file RA-008-C7RA11804J-s001.pdf]

## Electronic Supplementary Information

### Luminescent metal clusters/barium sulfate composites for white light-emitting devices and anti-counterfeiting labels

Min Wang, Zhenzhen Huang, Zilong Guo and Wensheng Yang\*

E-mail: wsyang@jlu.edu.cn

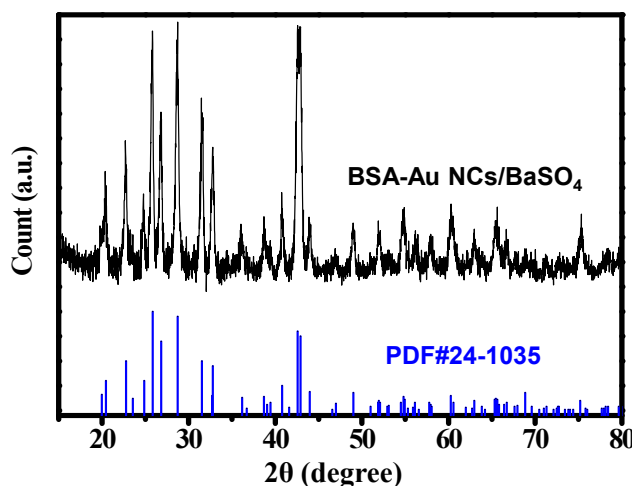

**Fig. S1.** XRD pattern of the powdered BSA-Au NCs/BaSO<sub>4</sub> composite. The peaks are well fitted to the standard pattern of orthorhombic BaSO<sub>4</sub> (blue). No characteristic diffraction peaks of the BSA-Au NCs at 31.82°, 45.65° and 63.70° corresponding to (111), (200) and (220) planes of face centered cubic gold were observed since they are rather weak and overlapped with those of the BaSO<sub>4</sub> matrix.

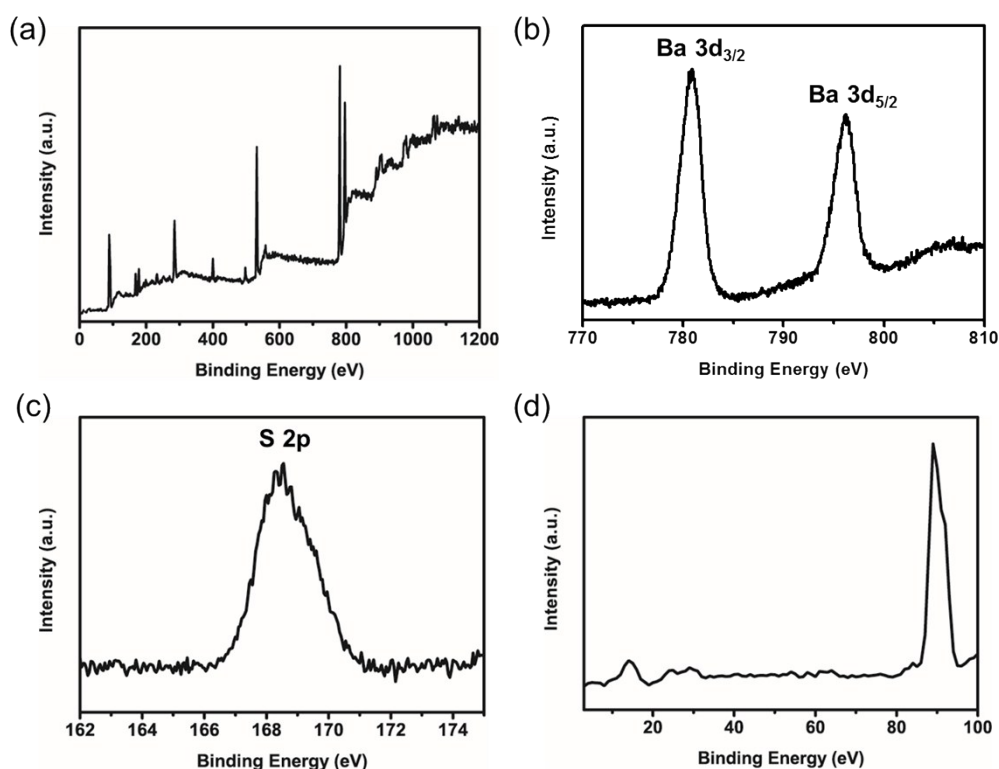

**Fig. S2.** XPS spectra of the BSA-Au NCs/BaSO<sub>4</sub> composites in the region of (a) 0–1200 eV, (b) 770–810 eV, (c) 162–175 eV and (d) 0–100 eV. The peaks of Ba 3d<sub>3/2</sub> and 3d<sub>5/2</sub> and S 2p could be well identified in the spectra. However, the peaks of Au 4f<sub>5/2</sub> (ca. 87.7 eV) and 4f<sub>7/2</sub> (ca. 84.0 eV) were not observed. These results mean that the BSA-Au NCs were mainly located in the BaSO<sub>4</sub> matrix but not on surface of the composite particles, suggesting the core-shell like structure of the particles.

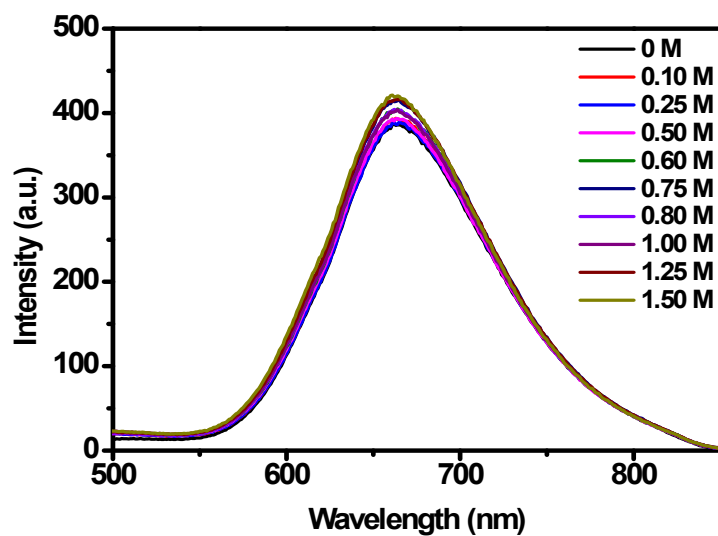

**Fig. S3.** Emission spectra of the BSA-Au NCs dispersed in BaCl<sub>2</sub> solutions with different concentrations. Emission intensity of the BSA-Au NCs changed slightly with the concentrations of BaCl<sub>2</sub>, meaning the adsorption of Ba<sup>2+</sup> ions have little effect on the emission intensity of the BSA-Au NCs.

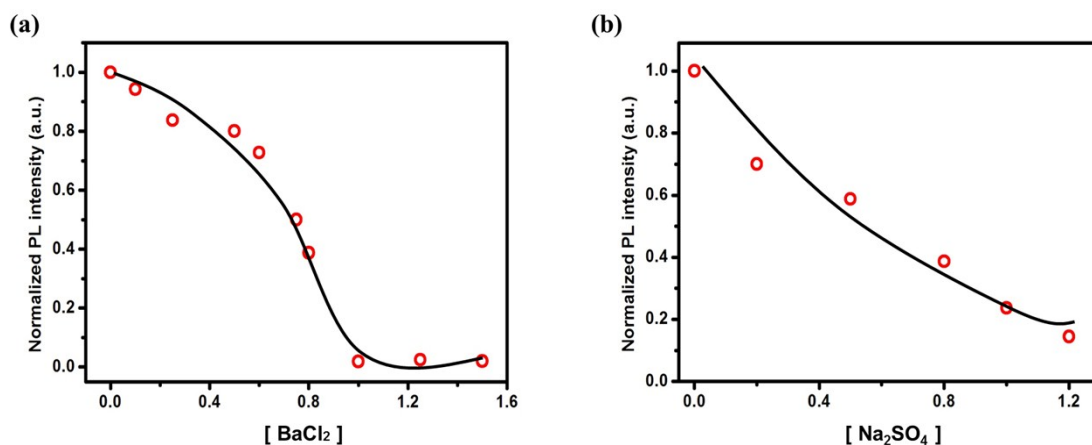

**Fig. S4.** Variation in emission intensity of the supernatants after centrifugation separation of the BSA-Au NCs/BaSO<sub>4</sub> composites prepared by altering the adding sequences of BaCl<sub>2</sub> and Na<sub>2</sub>SO<sub>4</sub>. (a) First addition of BaCl<sub>2</sub>, and then subsequent addition of equal molar Na<sub>2</sub>SO<sub>4</sub>. When the concentration of BaCl<sub>2</sub> is more than 1 M, no red color was observed in the supernatants, indicating the complete encapsulation of the BSA-Au NCs into the BaSO<sub>4</sub> matrix. Thus, the molar concentrate of BaCl<sub>2</sub> was selected to be 1 M to prepare the composites. (b) First addition of Na<sub>2</sub>SO<sub>4</sub>, and then subsequent addition of equal molar BaCl<sub>2</sub>. Red color of the BSA-Au NCs was still observable when the concentration of Na<sub>2</sub>SO<sub>4</sub> was higher than 1.2 M.

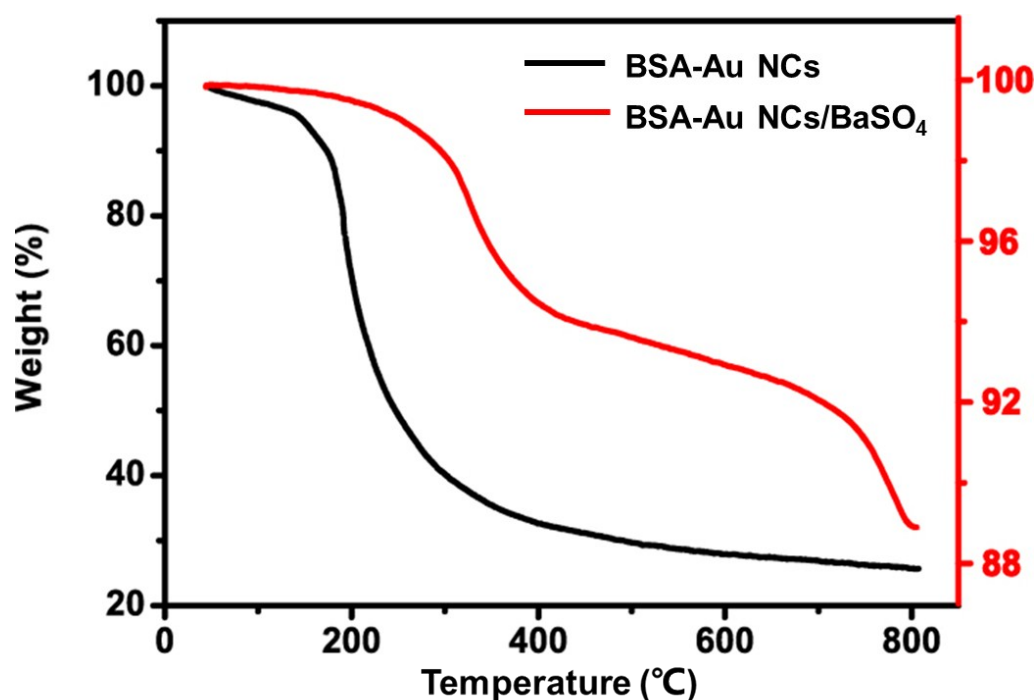

**Fig. S5.** TGA thermograms of the BSA-Au NCs (black curve) and the BSA-Au NCs/BaSO<sub>4</sub> composite (red curve). According to the experimental section, when the concentration of BaCl<sub>2</sub> is 1 M (5 ml, corresponding to 1.1670 g BaSO<sub>4</sub>), the NCs could be completely incorporated into BaSO<sub>4</sub> matrix. After centrifugation, weights of dried powders of the BSA-Au NCs/BaSO<sub>4</sub>, 11-MUA-Au NCs/BaSO<sub>4</sub> and GSH-Cu NCs/BaSO<sub>4</sub> composites were 1.2057, 1.1950 and 1.1854 g, respectively. After subtraction of the weight of BaSO<sub>4</sub>, the weights of the BSA-Au NCs, 11-MUA-Au NCs and GSH-Cu NCs were derived to be 38.7, 28.0 and 18.4 mg, corresponding to weight ratios of 3.21%, 2.34% and 1.55% respectively. A weight loss of 4.25 % was identified for the pure BSA-Au NCs when the temperature exceeded 100 °C and only a weight loss of 0.01% was identified for the BSA-Au NCs/BaSO<sub>4</sub> composite at the same temperature, corresponding to a weight of 0.31% for the BSA-Au NCs, indicating the improved thermal stability of the BSA-Au NCs in the composite.
